# Supplementary material
Source: Research Square preprint supplement (doi:10.21203/rs.3.rs-9247082/v1)
Supplement: Supplementary file 1 [file 2a9eff2772f03ac3deee9f32.docx]

# Energy density assumptions

| **fuel** | **Low Heating Value energy density (GJ/tonne fuel)** | **Volumetric density (tonne/m3)** |
| --- | --- | --- |
| Bio-LNG | 50 | 0.45 |
| Bio-methanol | 20 | 0.8 |
| bio-MGO | 41.2 | 0.98 |
| Blue ammonia | 18.8 | 0.68 |
| Blue methanol | 20 | 0.8 |
| e-ammonia | 18.8 | 0.68 |
| e-LNG | 50 | 0.45 |
| e-methanol | 20 | 0.8 |
| e-MGO | 41.2 | 0.98 |
| LNG | 50 | 0.45 |
| LSFO | 41.2 | 0.98 |

# Scrapping age

Table : Average scrapping age for each ship type and size bin (size bins are based on the IMO 4th GHG study)

| **Ship type** | **Size bin** | **Av. Age at scrapping** |
| --- | --- | --- |
| Bulk carrier | 1 | 36.6 |
| 2 | 32.1 |
| 3 | 30.4 |
| 4 | 28.7 |
| 5 | 22.2 |
| 6 | 28.5 |
| Chemical tanker | 1 | 31.7 |
| 2 | 27.9 |
| 3 | 24.9 |
| 4 | 24.2 |
| 5 | 22.5 |
| Container | 1 | 29.2 |
| 2 | 28.6 |
| 3 | 31 |
| 4 | 29.1 |
| 5 | 20.3 |
| 6 | 18.4 |
| 7 | 18.4 |
| 8 | 18.4 |
| 9 | 18.4 |
| General Cargo | 1 | 40.5 |
| 2 | 32 |
| 3 | 31.5 |
| 4 | 37.8 |
| Liquefied gas tanker | 1 | 32.5 |
| 2 | 34.1 |
| 3 | 31.5 |
| 4 | 31.5 |
| Oil tanker | 1 | 36.7 |
| 2 | 33.4 |
| 3 | 34.8 |
| 4 | 25.1 |
| 5 | 21.2 |
| 6 | 22.3 |
| 7 | 22.8 |
| 8 | 23.1 |
| Refrigerated bulk | 1 | 37.3 |
| 2 | 39.8 |
| 3 | 35.7 |
| 4 | 34.2 |
| Ro-Ro | 1 | 41.6 |
| 2 | 34.9 |
| 3 | 33 |
| 4 | 33.3 |
| Vehicle | 1 | 29.2 |
| 2 | 29.2 |
| 3 | 29.2 |

# Time charter rates

To obtain the time charter rates across a wide range of ship types and sizes, the quarterly time charter rates since 2010 reported in Clarksons SIN were collected for a sizes and segments available (listed in XX). Based on those, the relationship between the of the ship and the time charter rate of that ship is modelled as follows:

With:

- the average time charter rate across a basket of sizes (listed in XX, 3rd column) of the same segment at time which represents the market conditions of that time
- , and the coefficients reported in Table 7, which were estimated using the regression results presented in Table 6.

The detailed regression results and reported in XX. Future TC rate over the lifetime of the ship assumes that is constant and equal to the average after 2010. They are reported in Table 5. The resulting TC rate for the ships of interest are reported in Table 7.

Table : Time charter rates including in the regression analysis of time charter segment by ship size

| **Ship type** | **Series name** | **In the basket of sizes** |
| --- | --- | --- |
| Bulk carrier | 1 Year Timecharter Rate 45,000 dwt Bulkcarrier | FALSE |
| 1 Year Timecharter Rate 52,000 dwt Bulkcarrier | FALSE |
| 1 Year Timecharter Rate Capesize Bulkcarrier (Long Run Historical Series) | TRUE |
| 1 Year Timecharter Rate Supramax Bulkcarrier (Long Run Historical Series) | TRUE |
| 1 Year Timecharter Rate Panamax Bulkcarrier (Long Run Historical Series) | TRUE |
| Chemical tanker | 1 Year Timecharter Rate 13,000 dwt IMO II Chemical Tanker | TRUE |
| 1 Year Timecharter Rate 19,999 dwt Stainless Steel Chemical Tanker | TRUE |
| Container | Feeder Containership 350 TEU grd 6-12 Month Timecharter Rate | FALSE |
| Feeder Containership 725 TEU 6-12 Month Timecharter Rate | TRUE |
| Feeder Containership 1,000 TEU 6-12 Month Timecharter Rate | TRUE |
| Feeder Containership 1,700 TEU grd 6-12 Month Timecharter Rate | TRUE |
| Narrow Beam Containership 3,500 TEU 6-12 Month Timecharter Rate | TRUE |
| Feeder Containership 2,000 TEU 6-12 Month Timecharter Rate | TRUE |
| Feeder Containership 2,750 TEU 6-12 Month Timecharter Rate | TRUE |
| Feeder Containership 2,500 TEU grd 6-12 Month Timecharter Rate | TRUE |
| Narrow Beam Containership 4,250 TEU 6-12 Month Timecharter Rate | TRUE |
| Intermediate Containership 6,500 TEU 6-12 Month Timecharter Rate | FALSE |
| Intermediate Containership 8,500 TEU 6-12 Month Timecharter Rate | FALSE |
| General Cargo | General Cargo 3,500 dwt g’less 1 year Timecharter Rate | TRUE |
| Liquefied gas tanker | LNG 145K CBM 1 Year Timecharter Rate | FALSE |
| LNG 160K CBM 1 Year Timecharter Rate | TRUE |
| LNG 174K CBM 1 Year Timecharter Rate | FALSE |
| VLGC 12 Month Timecharter Rate (Long Run Historical Series) | TRUE |
| MHI 78K CBM LPG 12 Month Timecharter Rate | FALSE |
| 84K CBM LPG 12 Month Timecharter Rate | FALSE |
| 82K CBM LPG 12 Month Timecharter Rate | FALSE |
| 35K CBM LPG 12 Month Timecharter Rate | TRUE |
| 38K CBM F/R LPG 12 Month Timecharter Rate | FALSE |
| 40K CBM F/R LPG 12 Month Timecharter Rate | FALSE |
| 22,500 CBM Fully-Ref LPG 12 Month Timecharter Rate | FALSE |
| Semi Ref 22K CBM LPG 12 Month Timecharter Rate | FALSE |
| Ethylene 17,000 CBM LPG 12 Month Timecharter Rate | FALSE |
| Ethylene 21,500 CBM LPG 12 Month Timecharter Rate | FALSE |
| Semi Ref 15K CBM LPG 12 Month Timecharter Rate | FALSE |
| Semi Ref 20.5K CBM LPG 12 Month Timecharter Rate | FALSE |
| 11K CBM Pressure LPG 12 Month Timecharter Rate | FALSE |
| 7.4K CBM Pressure LPG 12 Month Timecharter Rate | FALSE |
| Ethylene 12,000 CBM LPG 12 Month Timecharter Rate | FALSE |
| Ethylene 6,499 CBM LPG 12 Month Timecharter Rate | FALSE |
| Ethylene 8,250 CBM LPG 12 Month Timecharter Rate | TRUE |
| 4.2K CBM S/R LPG 12 Month Timecharter Rate | FALSE |
| Oil tanker | 1 Year Timecharter Rate 110,000 dwt D/H Aframax | TRUE |
| 1 Year Timecharter Rate 150,000 dwt D/H Suezmax | TRUE |
| 1 Year Timecharter Rate 310,000 dwt D/H VLCC | TRUE |
| 1 Year Timecharter Rate 47-48,000 dwt MR Products Tanker | TRUE |
| 1 Year Timecharter Rate 74,000 dwt LR1 Products Tanker | TRUE |
| 1 Year Timecharter Rate 115,000 dwt LR2 Tanker | FALSE |
| Ro-Ro | Trailer Ro-Ro 3,500-4,000 lane m. 1 Year Timecharter Rate | TRUE |
| Trailer Ro-Ro 2,000-2,500 lane m. 1 Year Timecharter Rate | TRUE |
| Vehicle | PCTC 6,500 ceu 1 Year Timecharter Rate | TRUE |
| PCTC 5,000 ceu 1 Year Timecharter Rate | TRUE |

Table : Summary of TC rates estimate coefficients

| Ship type | obs | r_sq | Intercept |  |  |
| --- | --- | --- | --- | --- | --- |
| Bulk carrier | 726 | 0.92 | 1,674 | 0.000005 | 0.33 |
| Chemical tanker | 108 | 0.97 | -0 | 0.000052 | 0.14 |
| Container | 1,165 | 0.96 | 1,342 | 0.000268 | 0.30 |
| General cargo | 46 | 1 | 0 | 0.000285 | 0 |
| Liquefied gas tanker | 1,078 | 0.69 | 7,404 | 0.000009 | 0.13 |
| Oil tanker | 599 | 0.91 | 154 | 0.000003 | 0.55 |
| Ro-Ro | 108 | 0.99 | 0 | 0.000004 | 0.81 |
| Vehicle | 206 | 0.99 | 0 | 0.000163 | 0.07 |

Table : Average time charter rate in the basket of sizes 2010-2025 ()

| Ship Type | Value (USD /day) |
| --- | --- |
| Bulk carrier | 13,726.78 |
| Chemical tanker | 12,627.93 |
| Container | 16,162.00 |
| General cargo | 3,477.54 |
| Liquefied gas tanker | 38,431.07 |
| Oil tanker | 23,008.36 |
| Ro-Ro | 15,599.23 |
| Vehicle | 31,874.72 |

Table : Detailed results of the regression of time charter rates by ship size

*** General Cargo ***

OLS Regression Results

===============================================================================

Dep. Variable: tc_rate_usd_per_day R-squared: 1.000

Model: OLS Adj. R-squared: 1.000

Method: Least Squares F-statistic: 1.052e+32

Date: Thu, 11 Dec 2025 Prob (F-statistic): 0.00

Time: 12:35:48 Log-Likelihood: 1235.5

No. Observations: 46 AIC: -2467.

Df Residuals: 44 BIC: -2463.

Df Model: 1

Covariance Type: nonrobust

===================================================================================================

coef std err t P>|t| [0.025 0.975]

---------------------------------------------------------------------------------------------------

Intercept -4.547e-13 3.48e-13 -1.306 0.198 -1.16e-12 2.47e-13

size:market_tc_rate_usd_per_day 0.0003 2.79e-20 1.03e+16 0.000 0.000 0.000

market_tc_rate_usd_per_day 8.163e-08 7.82e-24 1.04e+16 0.000 8.16e-08 8.16e-08

==============================================================================

Omnibus: 1.958 Durbin-Watson: 0.689

Prob(Omnibus): 0.376 Jarque-Bera (JB): 1.256

Skew: 0.077 Prob(JB): 0.534

Kurtosis: 2.205 Cond. No. 3.83e+19

==============================================================================

Notes:

[1] Standard Errors assume that the covariance matrix of the errors is correctly specified.

[2] The smallest eigenvalue is 4.89e-24. This might indicate that there are

strong multicollinearity problems or that the design matrix is singular.

*** Oil tanker ***

OLS Regression Results

===============================================================================

Dep. Variable: tc_rate_usd_per_day R-squared: 0.907

Model: OLS Adj. R-squared: 0.907

Method: Least Squares F-statistic: 2901.

Date: Thu, 11 Dec 2025 Prob (F-statistic): 6.85e-308

Time: 12:35:48 Log-Likelihood: -5768.6

No. Observations: 599 AIC: 1.154e+04

Df Residuals: 596 BIC: 1.156e+04

Df Model: 2

Covariance Type: nonrobust

===================================================================================================

coef std err t P>|t| [0.025 0.975]

---------------------------------------------------------------------------------------------------

Intercept 153.6890 472.695 0.325 0.745 -774.662 1082.040

size:market_tc_rate_usd_per_day 3.125e-06 6.07e-08 51.507 0.000 3.01e-06 3.24e-06

market_tc_rate_usd_per_day 0.5546 0.019 29.461 0.000 0.518 0.592

==============================================================================

Omnibus: 84.435 Durbin-Watson: 0.273

Prob(Omnibus): 0.000 Jarque-Bera (JB): 363.209

Skew: -0.556 Prob(JB): 1.35e-79

Kurtosis: 6.649 Cond. No. 1.36e+10

==============================================================================

Notes:

[1] Standard Errors assume that the covariance matrix of the errors is correctly specified.

[2] The condition number is large, 1.36e+10. This might indicate that there are

strong multicollinearity or other numerical problems.

*** Vehicle ***

OLS Regression Results

===============================================================================

Dep. Variable: tc_rate_usd_per_day R-squared: 0.992

Model: OLS Adj. R-squared: 0.992

Method: Least Squares F-statistic: 1.298e+04

Date: Thu, 11 Dec 2025 Prob (F-statistic): 6.58e-215

Time: 12:35:48 Log-Likelihood: -1869.4

No. Observations: 206 AIC: 3745.

Df Residuals: 203 BIC: 3755.

Df Model: 2

Covariance Type: nonrobust

===================================================================================================

coef std err t P>|t| [0.025 0.975]

---------------------------------------------------------------------------------------------------

Intercept 1.114e-11 237.638 4.69e-14 1.000 -468.556 468.556

size:market_tc_rate_usd_per_day 0.0002 5.26e-06 30.899 0.000 0.000 0.000

market_tc_rate_usd_per_day 0.0652 0.031 2.110 0.036 0.004 0.126

==============================================================================

Omnibus: 10.558 Durbin-Watson: 0.270

Prob(Omnibus): 0.005 Jarque-Bera (JB): 23.646

Skew: 0.000 Prob(JB): 7.33e-06

Kurtosis: 4.660 Cond. No. 3.49e+08

==============================================================================

Notes:

[1] Standard Errors assume that the covariance matrix of the errors is correctly specified.

[2] The condition number is large, 3.49e+08. This might indicate that there are

strong multicollinearity or other numerical problems.

*** Ro-Ro ***

OLS Regression Results

===============================================================================

Dep. Variable: tc_rate_usd_per_day R-squared: 0.989

Model: OLS Adj. R-squared: 0.988

Method: Least Squares F-statistic: 4557.

Date: Thu, 11 Dec 2025 Prob (F-statistic): 9.28e-103

Time: 12:35:48 Log-Likelihood: -820.38

No. Observations: 108 AIC: 1647.

Df Residuals: 105 BIC: 1655.

Df Model: 2

Covariance Type: nonrobust

===================================================================================================

coef std err t P>|t| [0.025 0.975]

---------------------------------------------------------------------------------------------------

Intercept 2.956e-12 200.112 1.48e-14 1.000 -396.786 396.786

size:market_tc_rate_usd_per_day 4.258e-06 8.22e-08 51.789 0.000 4.09e-06 4.42e-06

market_tc_rate_usd_per_day 0.8111 0.013 62.427 0.000 0.785 0.837

==============================================================================

Omnibus: 0.264 Durbin-Watson: 0.407

Prob(Omnibus): 0.876 Jarque-Bera (JB): 0.441

Skew: 0.000 Prob(JB): 0.802

Kurtosis: 2.687 Cond. No. 3.89e+09

==============================================================================

Notes:

[1] Standard Errors assume that the covariance matrix of the errors is correctly specified.

[2] The condition number is large, 3.89e+09. This might indicate that there are

strong multicollinearity or other numerical problems.

*** Bulk carrier ***

OLS Regression Results

===============================================================================

Dep. Variable: tc_rate_usd_per_day R-squared: 0.920

Model: OLS Adj. R-squared: 0.920

Method: Least Squares F-statistic: 4183.

Date: Thu, 11 Dec 2025 Prob (F-statistic): 0.00

Time: 12:35:48 Log-Likelihood: -7122.2

No. Observations: 726 AIC: 1.425e+04

Df Residuals: 723 BIC: 1.426e+04

Df Model: 2

Covariance Type: nonrobust

===================================================================================================

coef std err t P>|t| [0.025 0.975]

---------------------------------------------------------------------------------------------------

Intercept 1674.1550 244.676 6.842 0.000 1193.796 2154.514

size:market_tc_rate_usd_per_day 5.224e-06 1.31e-07 39.808 0.000 4.97e-06 5.48e-06

market_tc_rate_usd_per_day 0.3337 0.015 21.793 0.000 0.304 0.364

==============================================================================

Omnibus: 498.806 Durbin-Watson: 0.296

Prob(Omnibus): 0.000 Jarque-Bera (JB): 32271.408

Skew: -2.368 Prob(JB): 0.00

Kurtosis: 35.317 Cond. No. 3.80e+09

==============================================================================

Notes:

[1] Standard Errors assume that the covariance matrix of the errors is correctly specified.

[2] The condition number is large, 3.8e+09. This might indicate that there are

strong multicollinearity or other numerical problems.

*** Container ***

OLS Regression Results

===============================================================================

Dep. Variable: tc_rate_usd_per_day R-squared: 0.959

Model: OLS Adj. R-squared: 0.959

Method: Least Squares F-statistic: 1.359e+04

Date: Thu, 11 Dec 2025 Prob (F-statistic): 0.00

Time: 12:35:48 Log-Likelihood: -11255.

No. Observations: 1165 AIC: 2.252e+04

Df Residuals: 1162 BIC: 2.253e+04

Df Model: 2

Covariance Type: nonrobust

===================================================================================================

coef std err t P>|t| [0.025 0.975]

---------------------------------------------------------------------------------------------------

Intercept 1342.3714 185.637 7.231 0.000 978.149 1706.594

size:market_tc_rate_usd_per_day 0.0003 2.58e-06 104.061 0.000 0.000 0.000

market_tc_rate_usd_per_day 0.2962 0.012 25.109 0.000 0.273 0.319

==============================================================================

Omnibus: 581.023 Durbin-Watson: 0.397

Prob(Omnibus): 0.000 Jarque-Bera (JB): 24987.008

Skew: -1.588 Prob(JB): 0.00

Kurtosis: 25.465 Cond. No. 1.19e+08

==============================================================================

Notes:

[1] Standard Errors assume that the covariance matrix of the errors is correctly specified.

[2] The condition number is large, 1.19e+08. This might indicate that there are

strong multicollinearity or other numerical problems.

*** Chemical tanker ***

OLS Regression Results

===============================================================================

Dep. Variable: tc_rate_usd_per_day R-squared: 0.972

Model: OLS Adj. R-squared: 0.971

Method: Least Squares F-statistic: 1790.

Date: Thu, 11 Dec 2025 Prob (F-statistic): 7.52e-82

Time: 12:35:48 Log-Likelihood: -844.53

No. Observations: 108 AIC: 1695.

Df Residuals: 105 BIC: 1703.

Df Model: 2

Covariance Type: nonrobust

===================================================================================================

coef std err t P>|t| [0.025 0.975]

---------------------------------------------------------------------------------------------------

Intercept -7.503e-12 290.057 -2.59e-14 1.000 -575.129 575.129

size:market_tc_rate_usd_per_day 5.215e-05 1.3e-06 40.039 0.000 4.96e-05 5.47e-05

market_tc_rate_usd_per_day 0.1395 0.031 4.484 0.000 0.078 0.201

==============================================================================

Omnibus: 9.072 Durbin-Watson: 0.436

Prob(Omnibus): 0.011 Jarque-Bera (JB): 20.631

Skew: -0.000 Prob(JB): 3.31e-05

Kurtosis: 5.141 Cond. No. 1.07e+09

==============================================================================

Notes:

[1] Standard Errors assume that the covariance matrix of the errors is correctly specified.

[2] The condition number is large, 1.07e+09. This might indicate that there are

strong multicollinearity or other numerical problems.

*** Liquefied gas tanker ***

OLS Regression Results

===============================================================================

Dep. Variable: tc_rate_usd_per_day R-squared: 0.690

Model: OLS Adj. R-squared: 0.689

Method: Least Squares F-statistic: 1194.

Date: Thu, 11 Dec 2025 Prob (F-statistic): 8.51e-274

Time: 12:35:48 Log-Likelihood: -11739.

No. Observations: 1078 AIC: 2.348e+04

Df Residuals: 1075 BIC: 2.350e+04

Df Model: 2

Covariance Type: nonrobust

===================================================================================================

coef std err t P>|t| [0.025 0.975]

---------------------------------------------------------------------------------------------------

Intercept 7404.1358 1199.136 6.175 0.000 5051.223 9757.049

size:market_tc_rate_usd_per_day 9.424e-06 2.1e-07 44.777 0.000 9.01e-06 9.84e-06

market_tc_rate_usd_per_day 0.1296 0.035 3.702 0.000 0.061 0.198

==============================================================================

Omnibus: 479.309 Durbin-Watson: 0.178

Prob(Omnibus): 0.000 Jarque-Bera (JB): 9166.799

Skew: 1.563 Prob(JB): 0.00

Kurtosis: 16.940 Cond. No. 8.25e+09

==============================================================================

Notes:

[1] Standard Errors assume that the covariance matrix of the errors is correctly specified.

[2] The condition number is large, 8.25e+09. This might indicate that there are

strong multicollinearity or other numerical problems.
